# Supplementary material
Source: PubMed Central journal article supplement (PMC2268161)

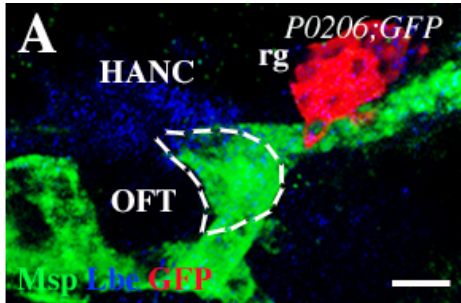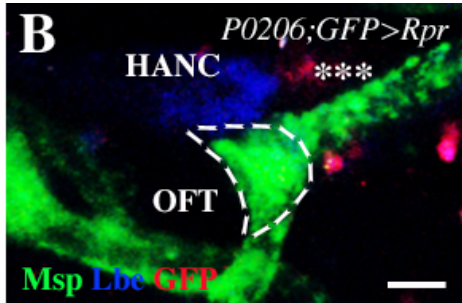

Supplement: supp_0706402105_06402Fig6.pdf [file supp_0706402105_06402Fig6.pdf]
